# Supplementary material for: One step synthesis of Au nanoparticle-cyclized polyacrylonitrile composite films and their use in organic nano-floating gate memory applications
Source: Royal Society of Chemistry journal article supplement (doi:10.1039/c5tc04166j), 2016-01-01
Supplement: c5tc04166j1.pdf [file c5tc04166j1.pdf]

## Supporting Information

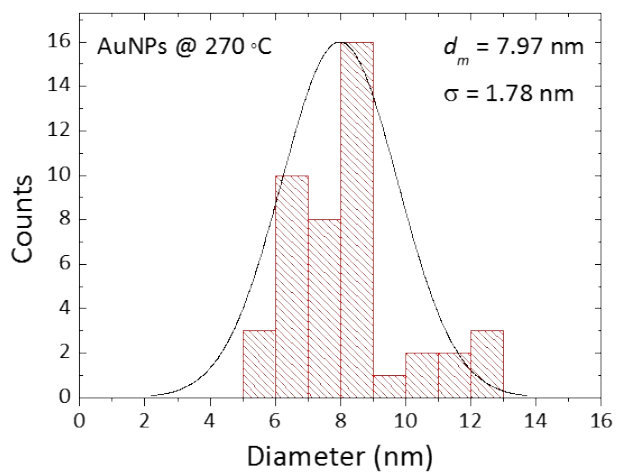

**Figure S1.** Histogram of the synthesized gold nanoparticles at 270 °C.

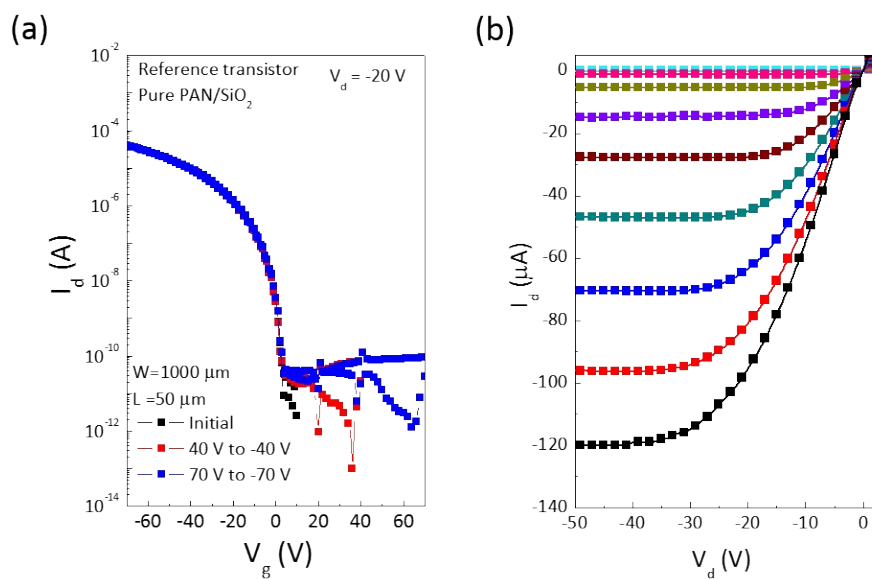

**Figure S2.** (a) Transfer and (b) output characteristics of reference organic transistors. Transfer curves were measured by a gate double sweep with ranges of  $\pm 10 \text{ V}$ ,  $\pm 40 \text{ V}$  and  $\pm 70 \text{ V}$  at  $V_d = -20 \text{ V}$ . Output curves were obtained with a gate bias from  $10 \text{ V}$  to  $-30 \text{ V}$  and a  $-5 \text{ V}$  step.

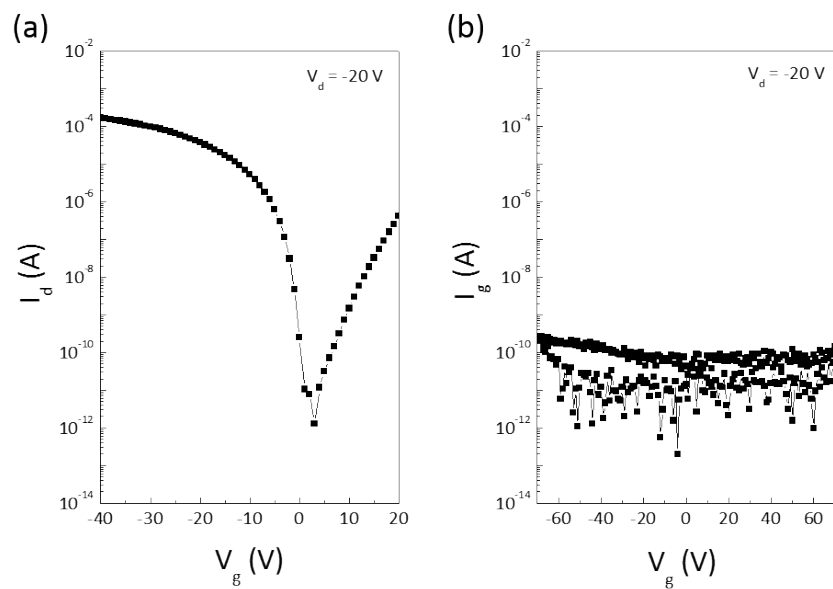

**Figure S3.** (a) Transfer curve during the measurement of output characteristics. (b) Gate leakage current while the transfer curve was measured with dual swept gate bias from 70V to -70V.

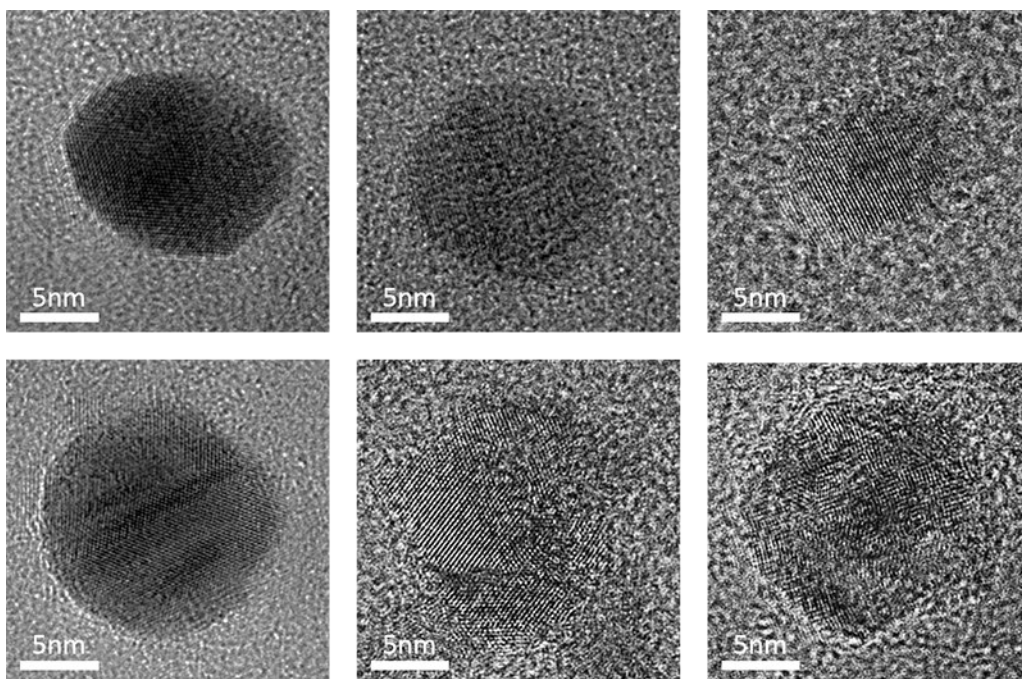

**Figure S4.** The HRTEM images of the synthesized gold nanoparticles in a PAN matrix that were obtained by the simple annealing method.
